# Supplementary material for: Knockdown of CD44 inhibits the invasion and metastasis of hepatocellular carcinoma both in vitro and in vivo by reversing epithelial-mesenchymal transition
Source: PubMed Central journal article supplement (PMC4480719; doi:10.18632/oncotarget.3488), 2015-03-08
Supplement: oncotarget-06-7828-s001.pdf [file oncotarget-06-7828-s001.pdf]

## Knockdown of CD44 inhibits the invasion and metastasis of hepatocellular carcinoma both *in vitro* and *in vivo* by reversing epithelial-mesenchymal transition

### Supplementary Material

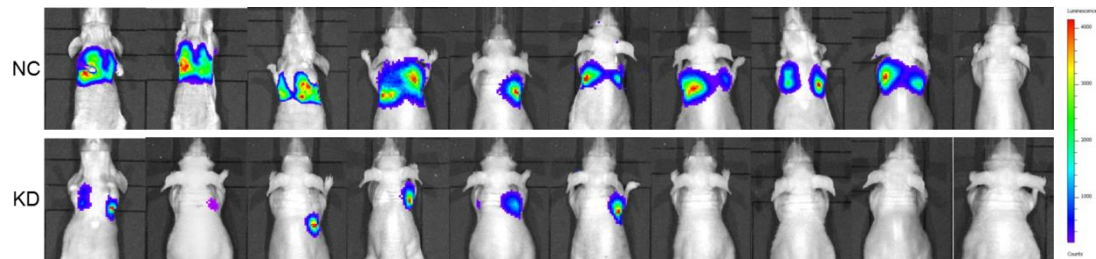

Supplemental Figure 1: The luminescent images of mice injected with luciferase-labeled MHCC97-H. NC means mice injected with MHCC97-H-NC, while KD means mice injected with MHCC97-H-KD.
